# Supplementary material for: High-density inclined polar skyrmions with giant piezoelectricity
Source: Research Square preprint supplement (doi:10.21203/rs.3.rs-6947151/v1), 2025-06-24
Supplement: Supplementary file 1 [file 3174cadd524ada5b97860238.docx]

**Supplementary Materials for**:

**High-density inclined polar skyrmions with giant piezoelectricity**

Xiang-Wei Guo1,†, Hui-Mei Li1,2,†, Yun-Long Tang1, Yin-Lian Zhu3,4, Xiu-Liang Ma3,5,6, Yu-Jia Wang1,2,*

1Shenyang National Laboratory for Materials Science, Institute of Metal Research, Chinese Academy of Sciences, Shenyang, 110016, China.

2School of Materials Science and Engineering, University of Science and Technology of China, Shenyang, 110016, China.

3Bay Area Center for Electron Microscopy, Songshan Lake Materials Laboratory, Dongguan, 523808, China.

4Hunan University of Science and Technology, Xiangtan, 411201, China.

5Institute of Physics, Chinese Academy of Sciences, Beijing, 100190, China.

6Quantum Science Center of Guangdong-HongKong-Macau Greater Bay Area (Guangdong), Shenzhen, 510290, China.

†These authors contributed equally: Xiang-Wei Guo, Hui-Mei Li

*Email: [yjwang@imr.ac.cn](mailto:yjwang@imr.ac.cn).

**This file includes:**

Supplementary Fig. 1 to 4

Supplementary Note 1

Tables S1 and S2

**Supplementary Figures:**


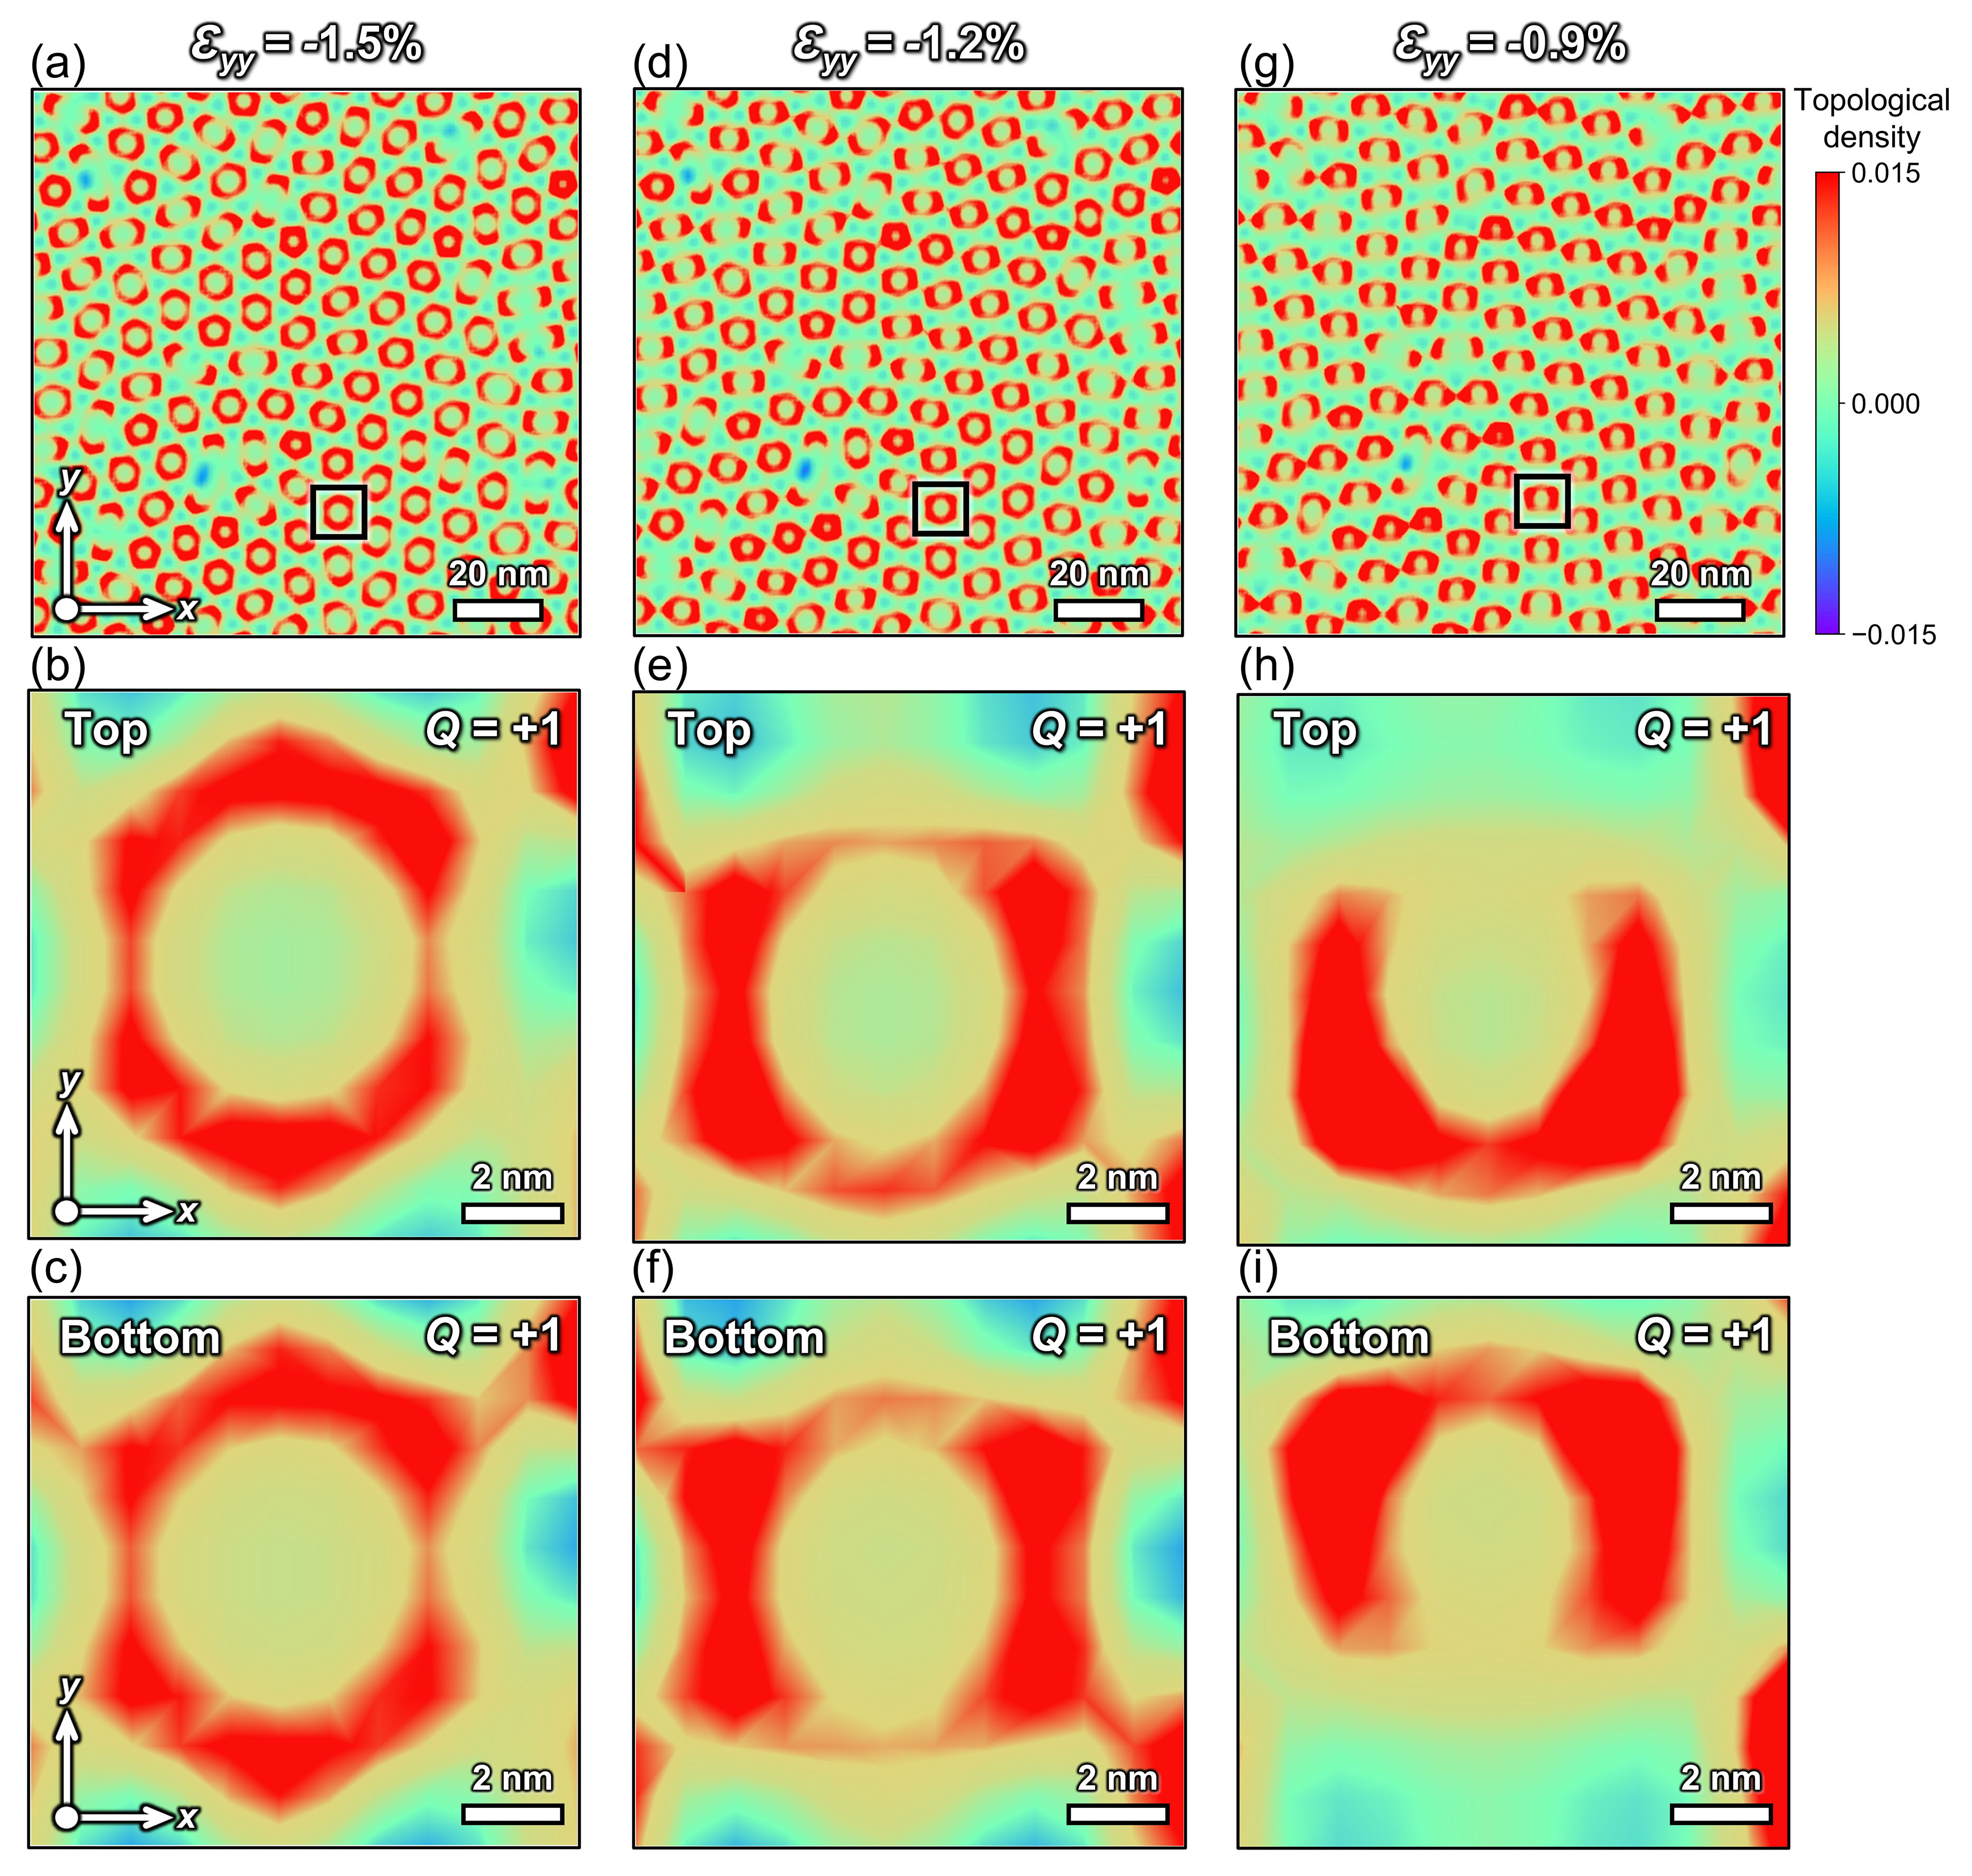


**Supplementary Fig. 1.** **Topological charge analysis of polar skyrmions under anisotropic epitaxial strain modulation** **in the PTO/STO superlattices. (a, d, g)** Planar views of the topological charge distribution corresponding to polar skyrmions shown in Fig. 2(a, d, g) under *εyy* = -1.5%, -1.2%, and -0.9%, respectively, with a fixed *εxx* = -1.5%. **(b, e, h)** Enlarged planar views of the topological charge distribution for the three polar topological states in (a), (d), and (g) at the top surface of the PTO layer highlighted by black boxes, respectively. **(c, f, i)** Enlarged planar views of the topological charge distribution for the three polar topological states in (a), (d), and (g) at the bottom surface of the PTO layer highlighted by black boxes, respectively.


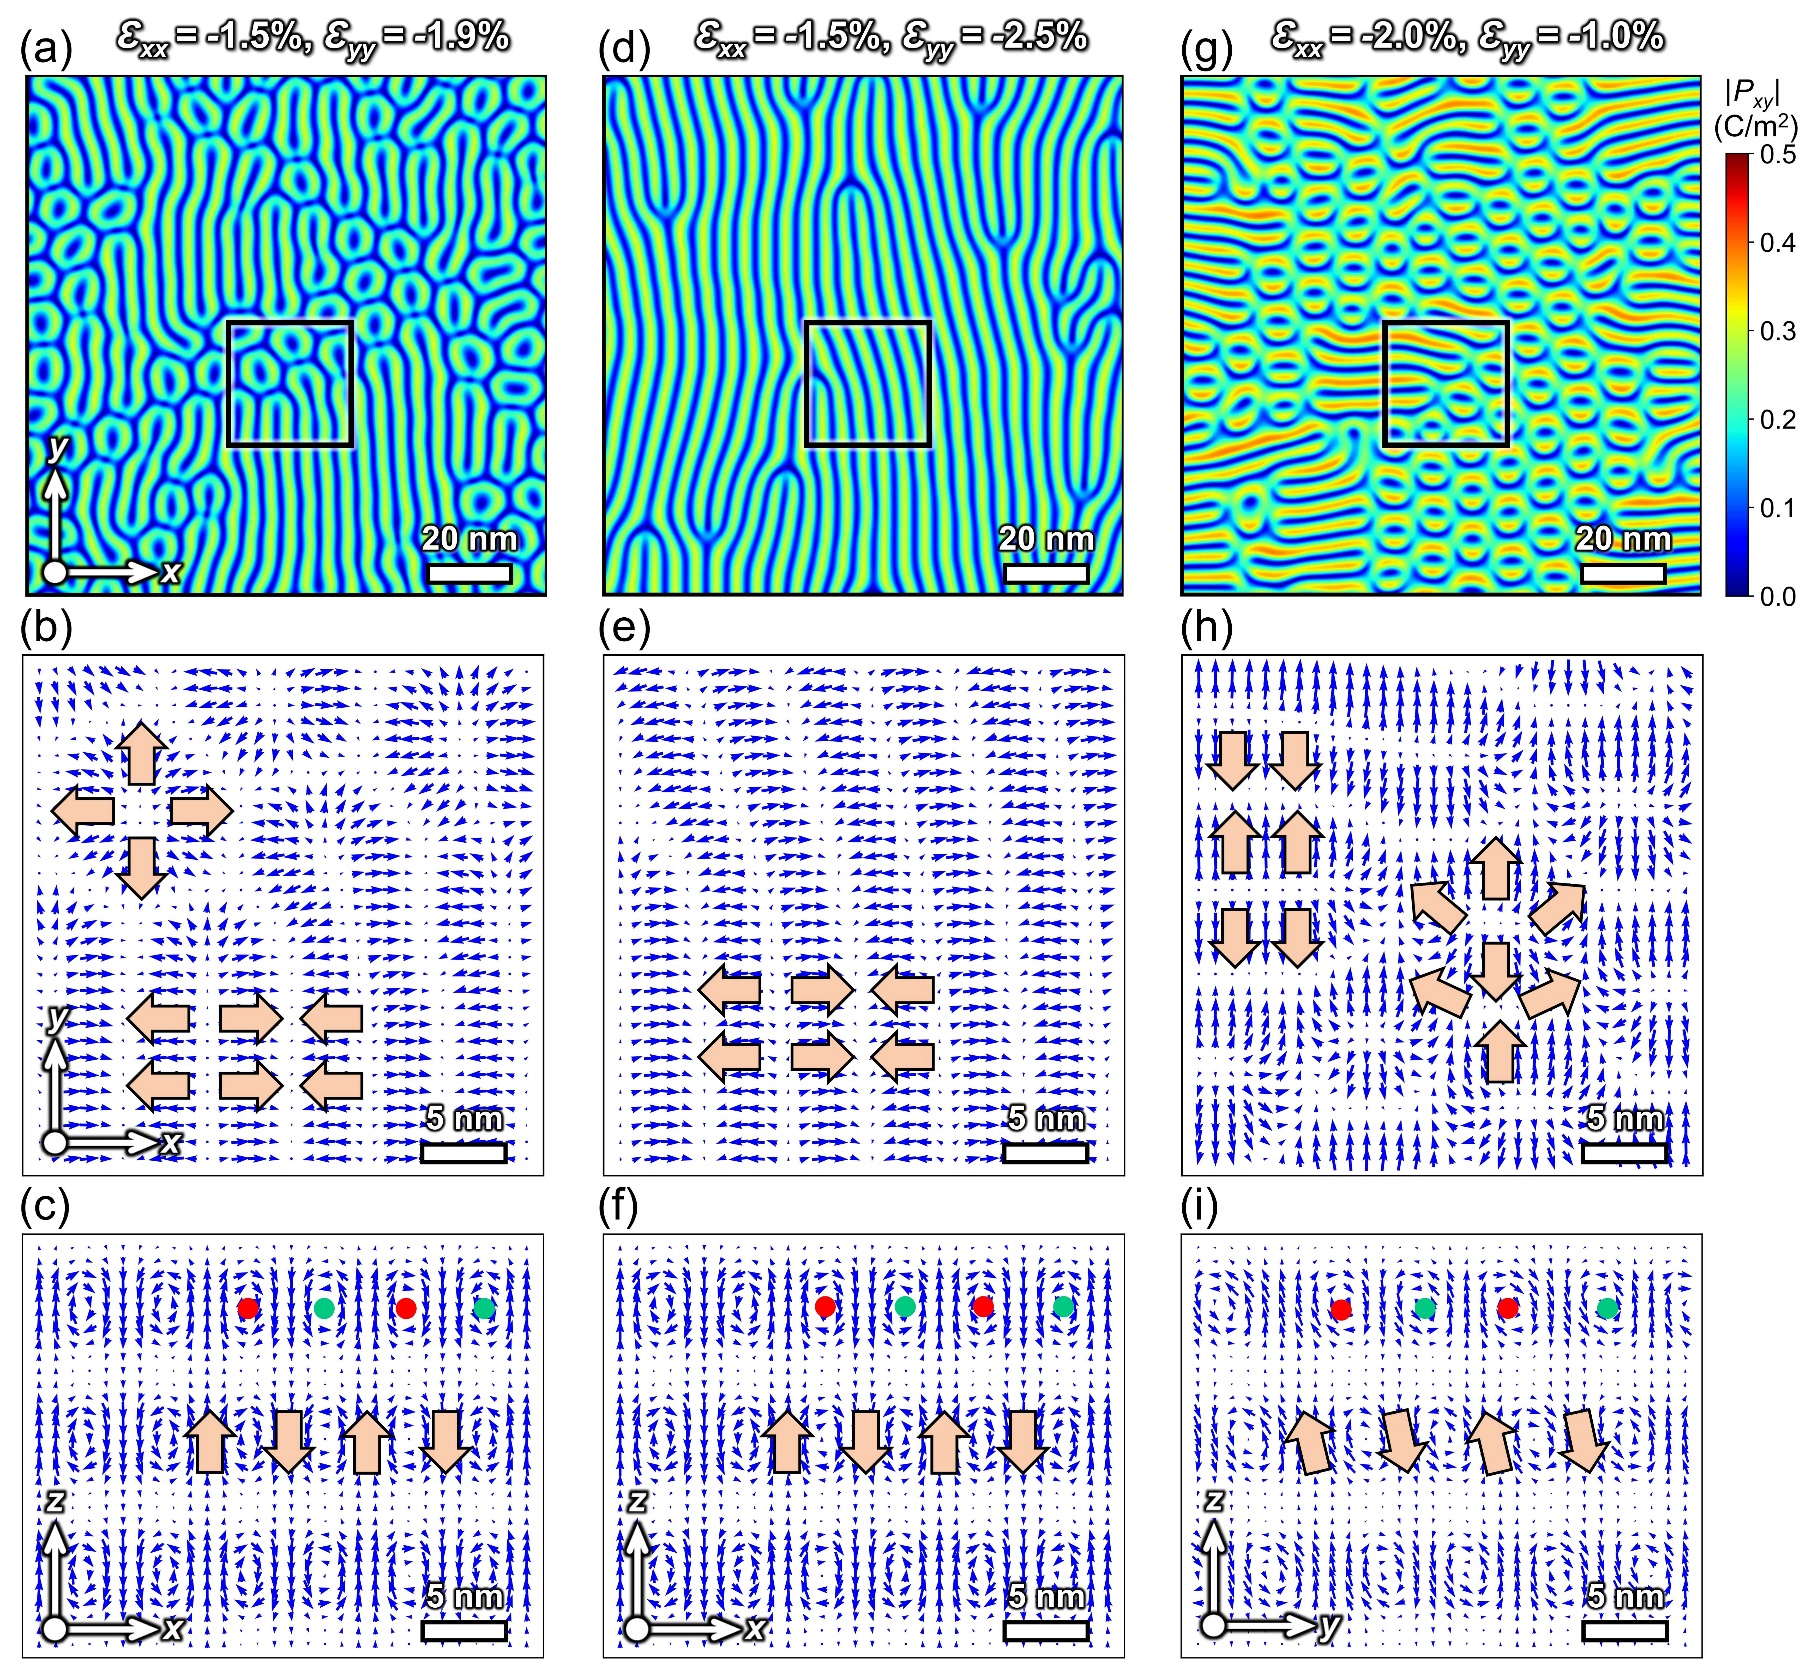


**Supplementary Fig. 2.** **More typical polar topological states in the phase diagram. (a, d, g)** Planar view of the ferroelectric polarization magnitude for three representative polar topological states: **(a)** a mixed state of polar skyrmions and vortex tubes under *εxx* = -1.5% and *εyy* =-1.9%; **(d)** a pure polar vortex tube state under *εxx* = -1.5% and *εyy* = -2.5%; **(g)** a mixed state of inclined skyrmions and vortex tubes under *εxx* = -2.0% and *εyy* = -1.0%. **(b, e, h)** Enlarged planar views of the polarization vector distributions for the three polar topological states highlighted by black boxes in (a), (d), and (g), respectively. **(c, f, i)** Corresponding enlarged cross-sectional views of the polarization vector distributions in the PTO/STO superlattices. The positions of the vortex cores are indicated by red and green dots.


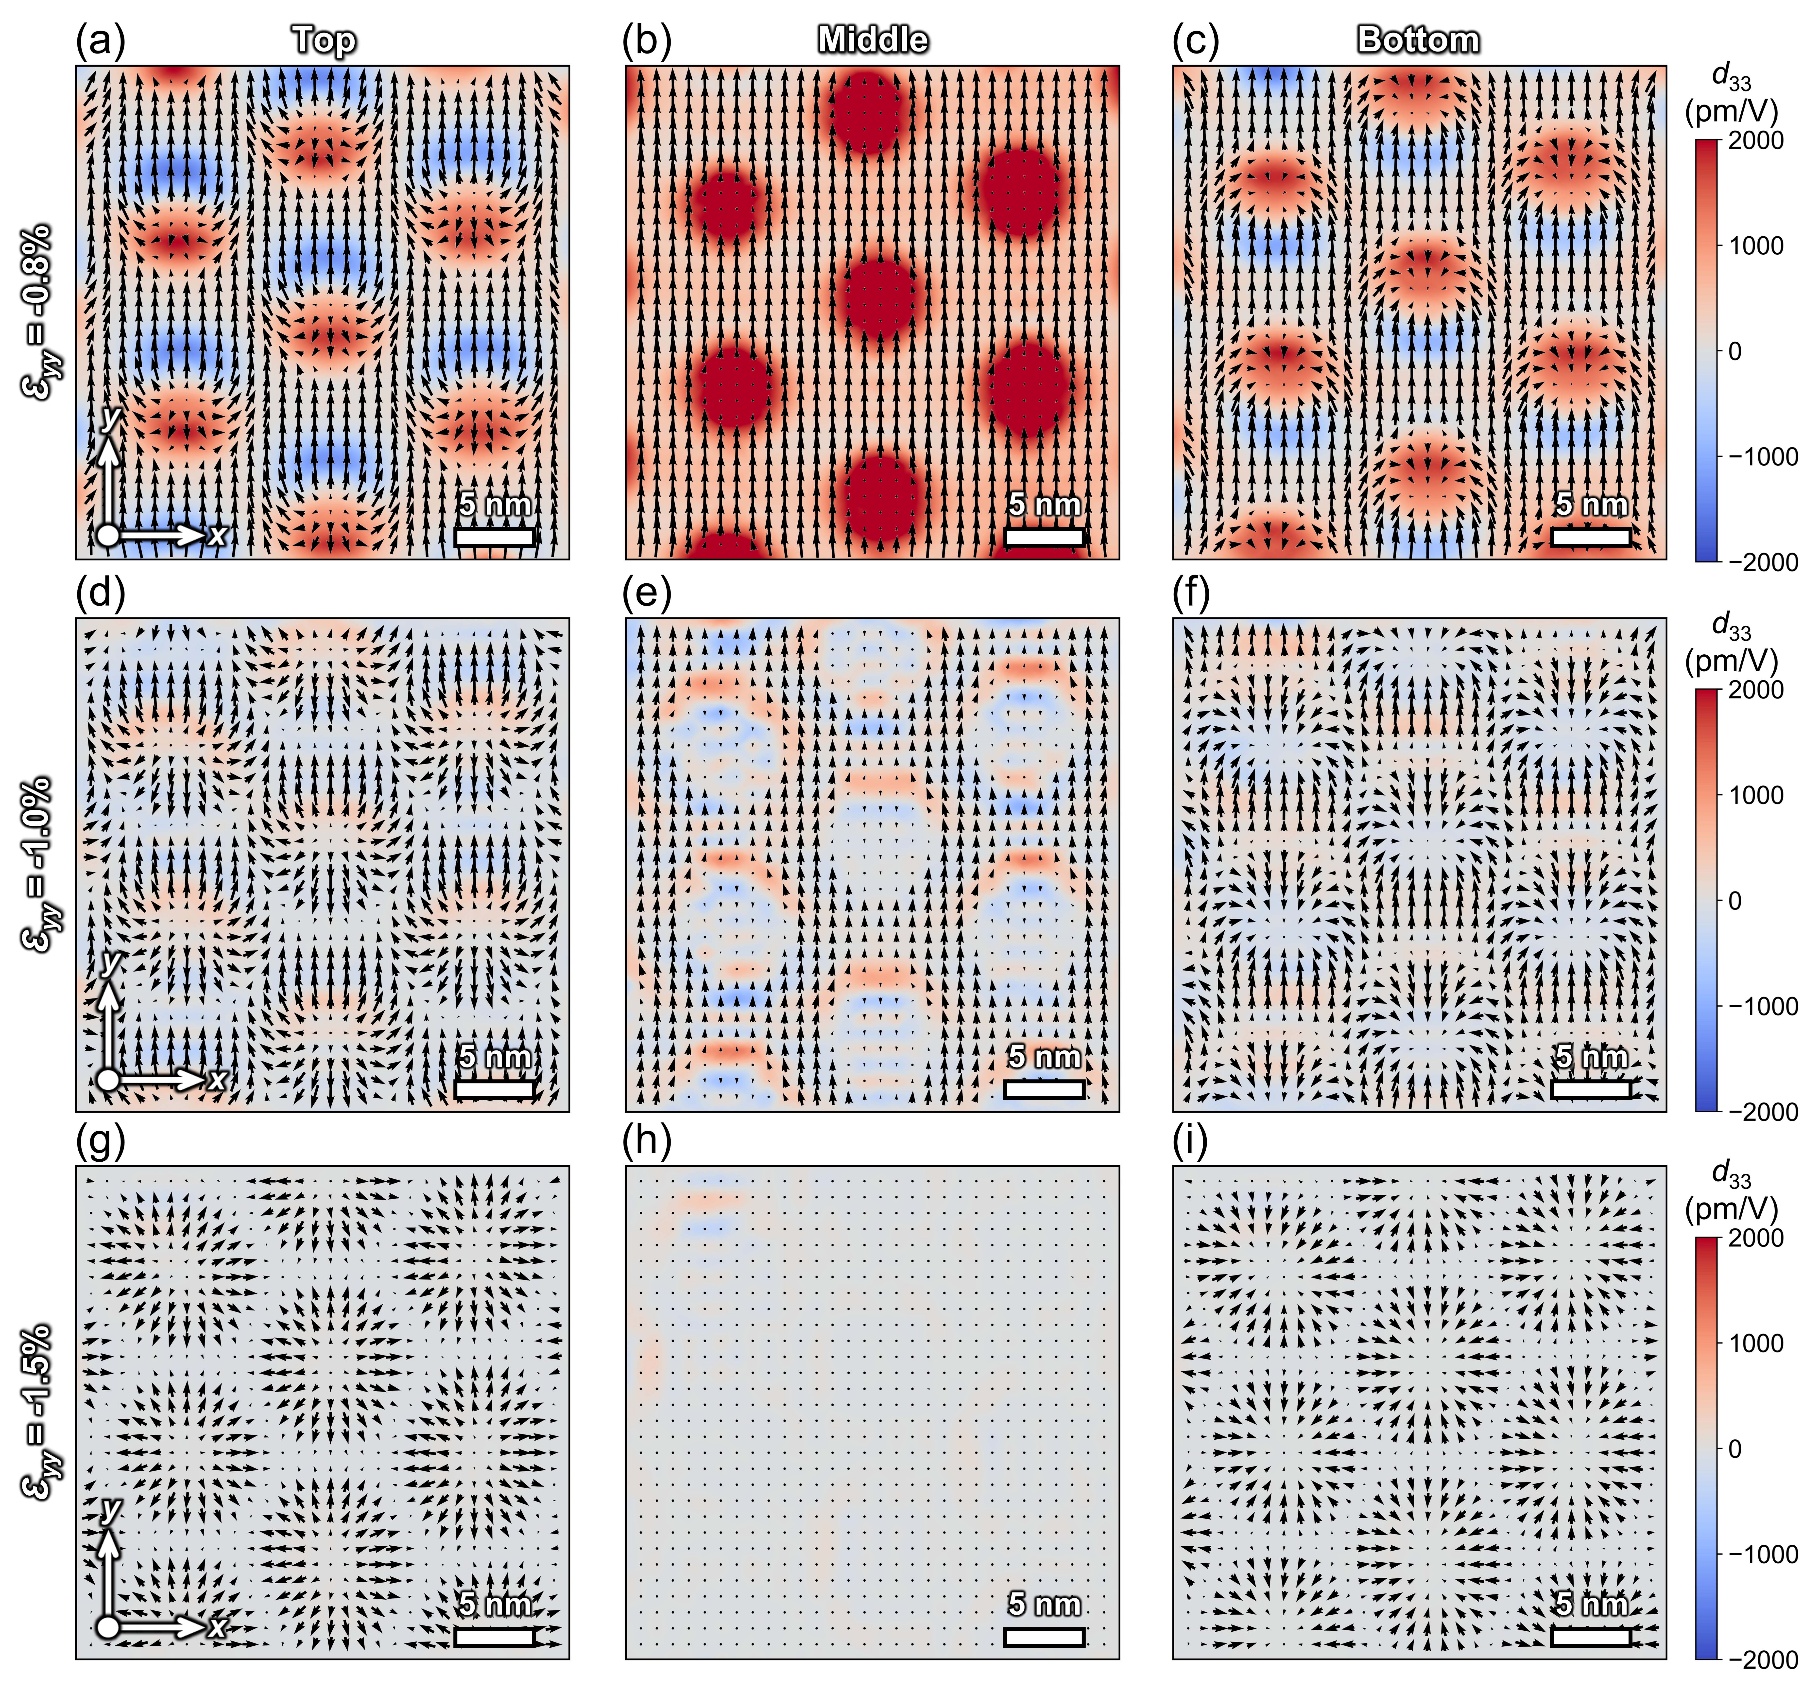


**Supplementary Fig. 3.** **Local piezoelectric response of polar skyrmions under different anisotropic epitaxial strains**. **(a-c)** Planar distribution of the local piezoelectric coefficient *d*33 and polarization vectors for inclined skyrmions at the top, middle, and bottom of the PTO layer under *εxx* = -1.5% and *εyy* = -0.8%. **(d-f)** Corresponding results for a transitional state between upright and inclined skyrmions under *εxx* = -1.5% and *εyy* = -1.0%. **(g-i)** Corresponding results for upright skyrmions under *εxx* = -1.5% and *εyy* = -1.5%.


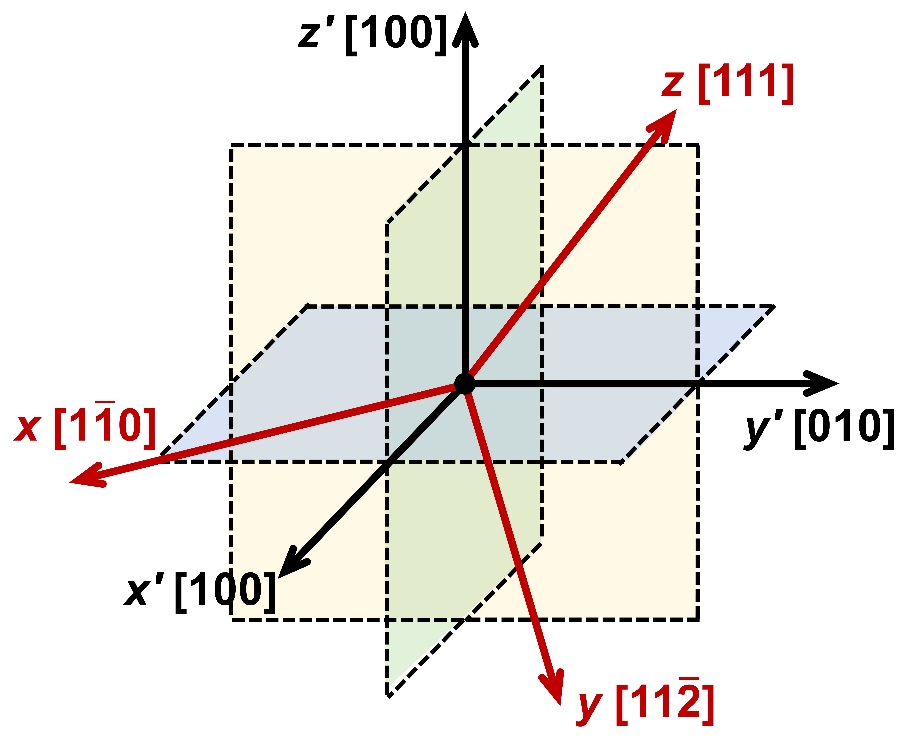


**Supplementary Fig. 4.** Schematic of geometric transformation from the (001)-oriented coordinate system (*x'*, *y'*, *z'*) to the (111)-oriented coordinate system (*x*, *y*, *z*).

**Supplementary Note 1.** **The expressions for the different energy density terms**

The total free energy *F* of the entire system contains contributions from the bulk, gradient, elastic, and electrostatic energies:

(S1)

The first term is the bulk energy density:

(S2)

where , , and are the Landau expansion coefficients. Here, , with being the Curie temperature.

The second term is the gradient energy density:

(S3)

where is the gradient energy coefficients and is the spatial differentiation of the polarization components.

The third term is the elastic energy density:

(S4)

where denotes the elastic stiffness tensor, and is the elastic strain. The elastic strain is defined as the difference between the total strain and eigenstrain the , i.e., . The eigenstrain is associated with spontaneous polarizations through the electrostrictive coefficient :

(S5)

The last term is the electrostatic energy density:

(S6)

where is the vacuum permittivity, is the background dielectric constant, and is the *i*th component of the total electric field. The electric field is the sum of the applied electric field and the depolarization field .

It is assumed that the equilibrium of mechanical stress and electrical field is much faster than the relaxation of domain structures. Accordingly, the following mechanical and electrical equilibrium equations are solved for each polarization configuration to obtain the corresponding elastic and electrostatic driving forces:

(S7)

(S8)

**Table S1.** Relationships between energy coefficients in the global (*x*, *y*, *z*) and local (*x'*, *y'*, *z'*) coordinate systems. A superscript “#” is used to indicate coefficients defined in the local system.

| Landau energy coefficients ,, | , , , |
| --- | --- |
| , , |
| , , |
| , , |
| , , |
| , , |
| , , |
| , |
| , |
| , |
| , |
| . |
| Gradient energy coefficients | , , |
| , , |
| , , |
| , . |
| Elastic stiffness coefficients | , , |
| , , |
| , , |
| , , . |
| Electrostrictive coefficients | , , , |
| , , , , |
| , , |
| , , . |

**Table S2.** Material parameters used for the PTO/STO superlattice in the local (*x'*, *y'*, *z'*) coordinate system.

| Parameter (SI units) | PTO | STO |
| --- | --- | --- |
| (C-2m2N) | −1.73108 | 1.85108 |
| (C-4m6N) | −7.3107 | 1.7109 |
| (C-4m6N) | 7.5108 | 1.37109 |
| (C-6m10N) | 2.6108 | 0 |
| (C-6m10N) | 6.1108 | 0 |
| (C-6m10N) | −3.7109 | 0 |
| (C-2m4) | 0.089 | 0.089 |
| (C-2m4) | −0.026 | −0.026 |
| (C-2m4) | 0.0675 | 0.0675 |
| (m-2N) | 1.7461011 | 1.7461011 |
| (m-2N) | 7.9371010 | 7.9371010 |
| (m-2N) | 1.1111011 | 1.1111011 |
| (C-2m4N) | 1.03510-10 | 1.03510-10 |
| (C-2m4N) | −1.03510-10 | −1.03510-10 |
| (C-2m4N) | 1.03510-10 | 1.03510-10 |
| (C-2m4N) | 1.7310-10 | 1.7310-10 |
|  | 40 | 40 |
